# Supplementary material for: Comparative Effectiveness of Different Treatment Pathways for Opioid Use Disorder
Source: PubMed Central journal article supplement — JAMA Netw Open. 2020 Feb 5;3(2):e1920622. doi: 10.1001/jamanetworkopen.2019.20622 (PMC11143463; doi:10.1001/jamanetworkopen.2019.20622), 2020-02-05
Supplement: jamanetwopen-e1920622-s001.pdf [file jamanetwopen-e1920622-s001.pdf]

## Supplementary Online Content

Wakeman SE, Laroche MR, Ameli O, et al. Comparative effectiveness of different treatment pathways for opioid use disorder. *JAMA Netw Open*. 2020;3(2):e1920622. doi:10.1001/jamanetworkopen.2019.20622

**eAppendix 1.** Cohort Selection

**eAppendix 2.** Supplementary Methods

**eFigure 1.** Definition of OUD

**eFigure 2.** Cohort Inclusion and Timeline

**eFigure 3.** Alluvial Flow of OUD Treatment Pathways in the Initial Cohort

**eTable.** Censoring by Baseline Characteristics

This supplementary material has been provided by the authors to give readers additional information about their work.

## eAppendix 1. Cohort Selection

We included individuals  $\geq 16$  years with OUD; with commercial or Medicare Advantage medical, pharmacy and behavioral coverage; and contiguous enrollment for three months before and after OUD treatment initiation date. For those in the No Treatment pathway we assigned a date selected at random from the treated pathways. We identified OUD as  $\geq 1$  inpatient or  $\geq 2$  outpatient claims for ICD-9/10 diagnosis codes for opioid dependence occurring within 3 months of each other; or  $\geq 1$  claims for diagnosis codes for opioid dependence, opioid use, or opioid abuse plus diagnosis codes for an encounter related to opioid overdose or an injection-related infection, or claims for medication for opioid use disorder or detoxification.

## eAppendix 2. Supplementary Methods

We used adjudicated medical and pharmacy claims for OUD treatment to identify the most common OUD treatment pathways. We initially described the sequence of services in weekly and then monthly (4-week) time intervals over the first 3 months following cohort entry. Of particular interest were the following types of services: inpatient detoxification or rehab, MOUD with buprenorphine/methadone or naltrexone and outpatient behavioral health (BH) visits. We further broke down behavioral health visits into intensive (including intensive outpatient services or partial hospitalization) and other types of BH.

The weekly and monthly analysis of treatment sequence identified 12,843, and 336 different combinations of treatment modalities over 12 weeks (figure S1). We used the monthly view of treatments to visually cluster treatment sequence into “treatment buckets” taking into account the frequency of patterns and a hierarchy of services. We also ran a latent Markov model as a confirmatory step to rule out possibility of non-obvious patterns.

There was substantial variation in treatment pathways provided to OUD patients (336 different combination based on monthly view of the data). BH without medication or inpatient detoxification was the most common pattern (57%) followed by buprenorphine/methadone (with or without BH, 19%) and inpatient detoxification or rehab (with or without medication 15%). Six per cent of patients received no type of OUD treatment over the initial 12 weeks (figure S1), Only 5.1% of patient who were initiated on non-medication treatments were later provided MOUD.

eFigure 1. Definition of OUD

|        | <b>Opioid Claim</b> | <b>ICD-9/ICD-10 Code for Dependence, Abuse or Use</b>                                                                                                                                                                                                                                                                                                                     | <b>Cohort Entry Date</b>              |
|--------|---------------------|---------------------------------------------------------------------------------------------------------------------------------------------------------------------------------------------------------------------------------------------------------------------------------------------------------------------------------------------------------------------------|---------------------------------------|
| A<br>A | Dependen<br>ce      | <ul style="list-style-type: none"> <li>• <math>\geq 2</math> outpatient that occur within 3 months of each other</li> </ul> <p>Or</p> <ul style="list-style-type: none"> <li>• <math>\geq 1</math> inpatient dependence claim</li> </ul><br><ul style="list-style-type: none"> <li>• Either of above does not occur during long-term prescribed opioid episode</li> </ul> | 1 <sup>st</sup> dependence claim date |

**Example 1: Likely treatment for chronic pain, no OUD**

Day 1 Day 90

Opioid Rx 1 – 21 days    Opioid Rx 2 – 21 days    Opioid Rx 3 – 21 days    Opioid Rx 4 – 21 days

← Long-term opioid episode →

Opioid dependence claim

**Example 1: Likely treatment for chronic pain, no OUD**

Day 1 Day 90

Opioid Rx 1 – 21 days    Opioid Rx 2 – 21 days    Opioid Rx 3 – 21 days    No further opioid Rx

← Long-term opioid episode →

Opioid dependence claim

Reference: Larochelle MR, Liebschutz JM, Zhang F, Ross-Degnan D, Wharam JF. Opioid Prescribing After Nonfatal Overdose and Association With Repeated

Overdose. *Annals Of Internal Medicine*. 2016;165(5):376-377. doi:10.7326/L16-0168

|          |                                                |                                                                                                                                                                                                                                                                                                                                                                                                                                                                                                                                                                                                                                                                                                                 |                                     |
|----------|------------------------------------------------|-----------------------------------------------------------------------------------------------------------------------------------------------------------------------------------------------------------------------------------------------------------------------------------------------------------------------------------------------------------------------------------------------------------------------------------------------------------------------------------------------------------------------------------------------------------------------------------------------------------------------------------------------------------------------------------------------------------------|-------------------------------------|
| <b>B</b> | <p>Dependence</p> <p>+</p> <p>Use or Abuse</p> | <ul style="list-style-type: none"> <li>- <math>\geq 1</math> Opioid dependence, abuse or use claim</li> <li>- Has one of the following confirmatory diagnoses or events at any time in the study period:             <ul style="list-style-type: none"> <li>- Evidence of opioid overdose</li> <li>- Evidence of MOUD</li> <li>- Opioid-related detox or rehab stay</li> <li>- Hep C</li> <li>- Infectious episode                 <ul style="list-style-type: none"> <li>- Endocarditis</li> <li>- Abscess/cellulitis</li> <li>- Phlebitis</li> <li>- Infectious arthritis</li> </ul> </li> </ul> </li> <li>- Claim and confirmatory diagnosis must:</li> <li>- occur within 3 months of each other</li> </ul> | <p>First date of two components</p> |
|----------|------------------------------------------------|-----------------------------------------------------------------------------------------------------------------------------------------------------------------------------------------------------------------------------------------------------------------------------------------------------------------------------------------------------------------------------------------------------------------------------------------------------------------------------------------------------------------------------------------------------------------------------------------------------------------------------------------------------------------------------------------------------------------|-------------------------------------|

|  |                                                                                                                                                       |  |
|--|-------------------------------------------------------------------------------------------------------------------------------------------------------|--|
|  | <p>and</p> <ul style="list-style-type: none"><li>- can occur in either order (e.g, confirmatory dx can be 1<sup>st</sup> or 2<sup>nd</sup>)</li></ul> |  |
|--|-------------------------------------------------------------------------------------------------------------------------------------------------------|--|

eFigure 2. Cohort Inclusion and Timeline

### OUD pathways study timeline by month

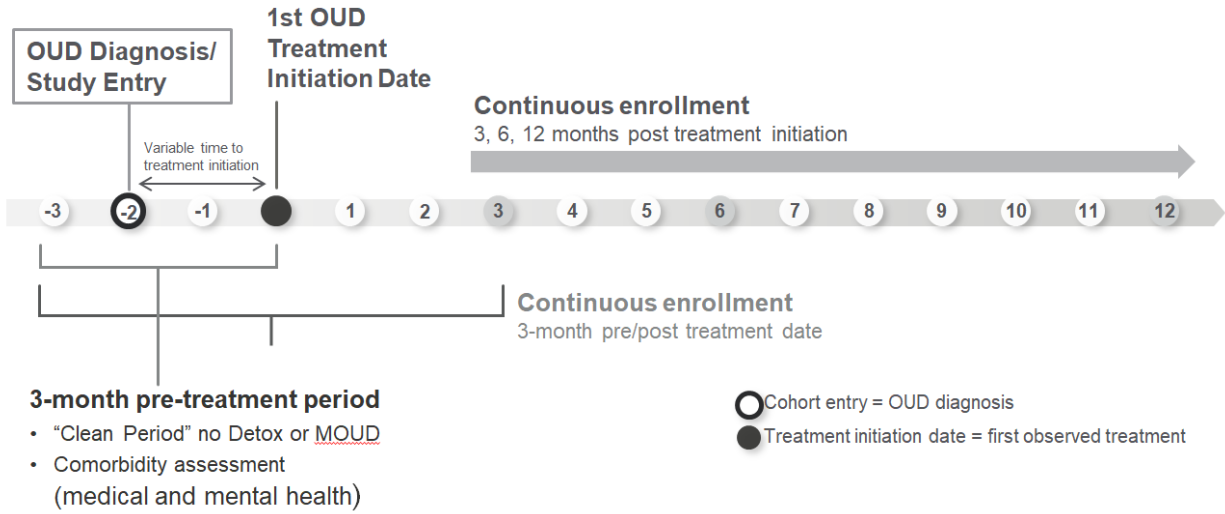

eFigure 3. Alluvial Flow of OUD Treatment Pathways in the Initial Cohort

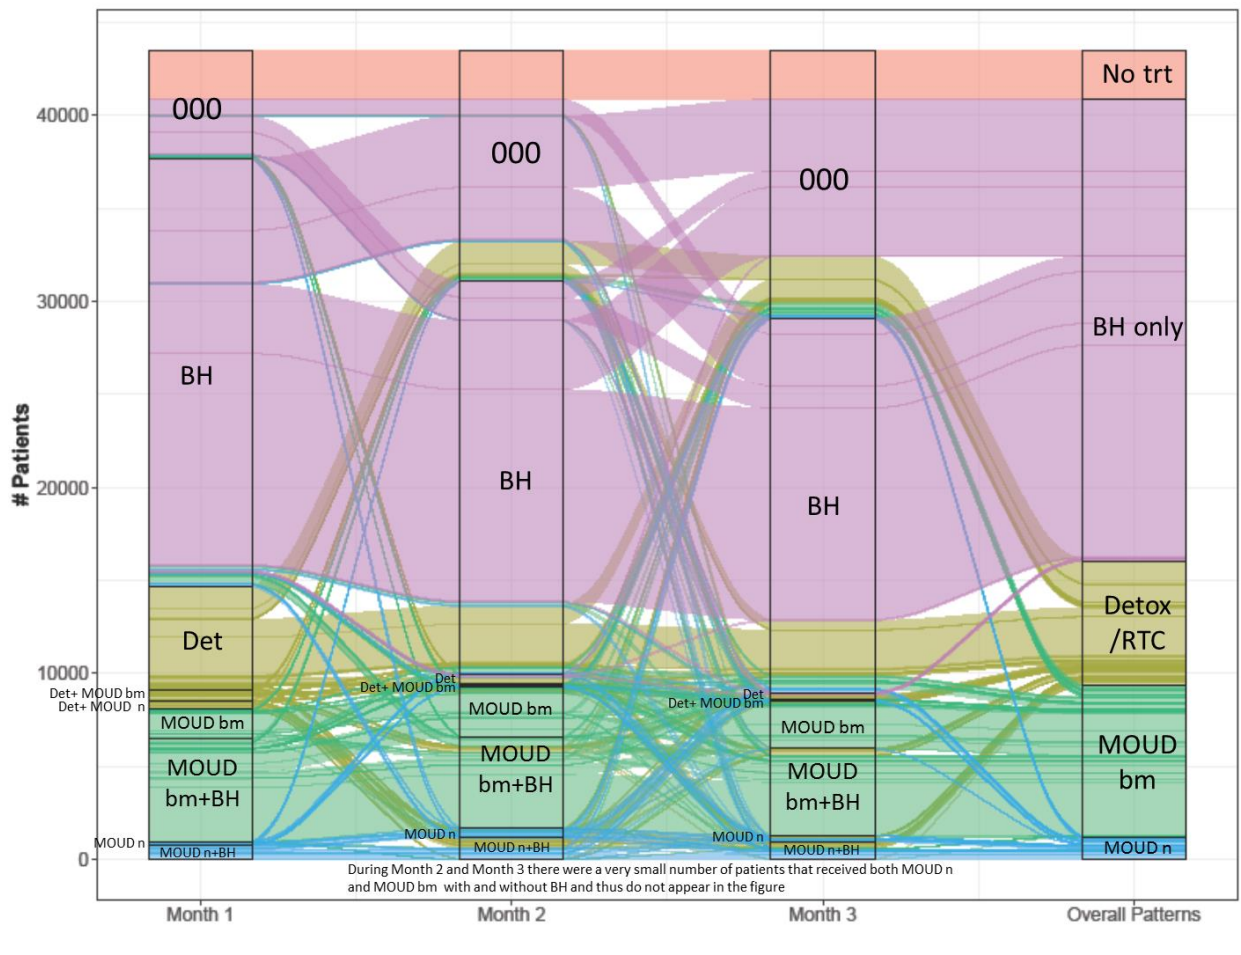



Legend key: 000 – no inpatient detox, BH or medication, BH: outpatient behavioral visits only,  
Det: inpatient detoxification or rehabilitation, MOUD bm: MOUD buprenorphine/methadone,  
MOUD n: MOUD naltrexone

eTable. Censoring by Baseline Characteristics

|                                        |               |           | Not<br>Censored | Censored<br>Q2 | Censored<br>Q3 | Censored<br>Q4 |
|----------------------------------------|---------------|-----------|-----------------|----------------|----------------|----------------|
| Variable                               | Levels        | N =40,885 | N=21,200        | N=7,336        | N=6,811        | N=5,538        |
| <b>Total Sample</b>                    |               |           | <b>52%</b>      | <b>18%</b>     | <b>17%</b>     | <b>14%</b>     |
| <b>Column %</b>                        |               | %         | %               | %              | %              | %              |
| <b>Age Group</b>                       | 16-25         | 15        | 16              | 13             | 13             | 14             |
|                                        | 26-34         | 13        | 10              | 18             | 15             | 14             |
|                                        | 35-44         | 15        | 14              | 18             | 15             | 14             |
|                                        | 45-54         | 18        | 19              | 17             | 16             | 16             |
|                                        | 54-64         | 22        | 23              | <b>18</b>      | 21             | 22             |
|                                        | >=65          | 18        | 18              | <b>16</b>      | 19             | 20             |
| <b>Gender</b>                          | Female        | 46        | 47              | 43             | 46             | 46             |
|                                        | Male          | 54        | 53              | <b>57</b>      | 54             | 54             |
| <b>Insurance type</b>                  | Commercial    | 58        | 55              | <b>66</b>      | 60             | 57             |
|                                        | MA<65         | 25        | <b>28</b>       | 19             | 22             | 25             |
|                                        | MA≥65         | 17        | 17              | 15             | 18             | 19             |
| <b>Race/ethnicity</b>                  | White         | 74        | 75              | 73             | 73             | 73             |
|                                        | Black         | 12        | 12              | 12             | 12             | 12             |
|                                        | Hispanic      | 8         | 8               | 8              | 8              | 9              |
|                                        | Other/unknown | 5         | 4               | 7              | 7              | 6              |
| <b>Elixhauser-medical (mean score)</b> |               | 1.7       | 1.7             | 1.7            | 1.8            | 1.8            |
| <b>Mental Health Comorbidities</b>     | Depression    | 24        | 24              | 25             | 24             | 23             |
|                                        | Anxiety       | 26        | 25              | 28             | 27             | 26             |
|                                        | ADHD          | 4         | 4               | 4              | 5              | 4              |
|                                        | PTSD          | 4         | 3               | 4              | 4              | 3              |

|                               |                |    |    |    |    |    |
|-------------------------------|----------------|----|----|----|----|----|
|                               | Alcohol        | 10 | 10 | 11 | 11 | 10 |
|                               | Bipolar        | 8  | 8  | 7  | 8  | 7  |
|                               | Psychosis      | 4  | 4  | 4  | 3  | 4  |
| <b>Indicators of Severity</b> | IVDU infection | 14 | 14 | 13 | 14 | 13 |
|                               | Hepatitis C    | 5  | 5  | 4  | 5  | 5  |
|                               | Overdose       | 5  | 5  | 6  | 5  | 6  |
